# Supplementary material for: Pleiotropic ZmICE1 Is an Important Transcriptional Regulator of Maize Endosperm Starch Biosynthesis
Source: Front Plant Sci. 2022 Jul 22;13:895763. doi: 10.3389/fpls.2022.895763 (PMC9355408; doi:10.3389/fpls.2022.895763)
Supplement: Supplementary file 1 [file Table_1.XLSX]

## Sheet: Sheet1
Table S1: The list of gene ID for all identified ZmbHLHs
Gene Name	Gene ID(v3)	Gene ID(v4)	Gene Name	Gene ID(v3)	Gene ID(v4)	Gene Name	Gene ID(v3)	Gene ID(v4)	Gene Name	Gene ID(v3)	Gene ID(v4)
ZmbHLH1	GRMZM5G822829	-	ZmbHLH52	GRMZM5G812883	Zm00001d049721	ZmbHLH103	GRMZM2G301089	Zm00001d033957	ZmbHLH154	GRMZM2G385543	Zm00001d013357
ZmbHLH2	GRMZM2G172795	-	ZmbHLH53	GRMZM2G111146	Zm00001d017677	ZmbHLH104	GRMZM2G088443	Zm00001d039764	ZmbHLH155	GRMZM2G042101	Zm00001d052254
ZmbHLH3	GRMZM2G180452	Zm00001d028297	ZmbHLH54	AC193786.3_FG005	Zm00001d011847	ZmbHLH105	GRMZM2G082586	Zm00001d020790	ZmbHLH156	GRMZM2G317450	Zm00001d017908
ZmbHLH4	AC177924.2_FG001	Zm00001d003964	ZmbHLH55	GRMZM2G030762	Zm00001d012067	ZmbHLH106	GRMZM2G089501	Zm00001d020834	ZmbHLH157	GRMZM2G009478	Zm00001d005969
ZmbHLH5	GRMZM2G116785	Zm00001d037098	ZmbHLH56	GRMZM2G072376	Zm00001d028504	ZmbHLH107	GRMZM2G145146	Zm00001d020763	ZmbHLH158	GRMZM2G165090	Zm00001d030972
ZmbHLH6	GRMZM2G417597	Zm00001d006022	ZmbHLH57	GRMZM2G159937	Zm00001d043706	ZmbHLH108	GRMZM2G119823	Zm00001d025141	ZmbHLH159	GRMZM2G004356	Zm00001d013073
ZmbHLH7	GRMZM2G042920	Zm00001d026317	ZmbHLH58	AC198518.3_FG005	Zm00001d04135	ZmbHLH109	GRMZM2G013688	Zm00001d021164	ZmbHLH160	GRMZM2G006631	Zm00001d027987
ZmbHLH8	GRMZM2G038479	Zm00001d052728	ZmbHLH59	GRMZM2G303463	Zm00001d007536	ZmbHLH110	GRMZM2G452996	Zm00001d027753	ZmbHLH161	GRMZM2G045883	Zm00001d018119
ZmbHLH9	GRMZM2G407119	Zm00001d047999	ZmbHLH60	GRMZM2G016756	Zm00001d013130	ZmbHLH111	GRMZM2G150327	Zm00001d030232	ZmbHLH162	GRMZM2G093744	Zm00001d024679
ZmbHLH10	GRMZM2G067654	Zm00001d045107	ZmbHLH61	GRMZM5G818776	Zm00001d049721	ZmbHLH112	GRMZM5G879527	Zm00001d031441	ZmbHLH163	GRMZM5G865967	Zm00001d031044
ZmbHLH11	GRMZM2G176289	Zm00001d051569	ZmbHLH62	GRMZM2G333582	Zm00001d008853	ZmbHLH113	GRMZM2G471635	Zm00001d050016	ZmbHLH164	GRMZM2G058451	Zm00001d021701
ZmbHLH12	GRMZM2G316758	Zm00001d052038	ZmbHLH63	GRMZM2G166642	-	ZmbHLH114	GRMZM2G095899	Zm00001d033407	ZmbHLH165	GRMZM2G145579	Zm00001d049870
ZmbHLH13	GRMZM2G091003	Zm00001d051509	ZmbHLH64	GRMZM2G175955	-	ZmbHLH115	GRMZM2G068604	Zm00001d031167	ZmbHLH166	GRMZM2G114444	Zm00001d044216
ZmbHLH14	GRMZM5G817854	-	ZmbHLH65	GRMZM2G387528	Zm00001d008205	ZmbHLH116	GRMZM2G042895	Zm00001d024522	ZmbHLH167	GRMZM2G147685	Zm00001d003677
ZmbHLH15	GRMZM2G057260	Zm00001d021987	ZmbHLH66	GRMZM2G163233	Zm00001d006564	ZmbHLH117	GRMZM2G062541	Zm00001d024783	ZmbHLH168	GRMZM2G030744	Zm00001d018416
ZmbHLH16	GRMZM2G021276	Zm00001d008174	ZmbHLH67	GRMZM2G397518	Zm00001d042989	ZmbHLH118	GRMZM2G061906	Zm00001d038357	ZmbHLH169	GRMZM2G113257	Zm00001d005919
ZmbHLH17	GRMZM2G137358	Zm00001d034503	ZmbHLH68	GRMZM2G115960	Zm00001d040536	ZmbHLH119	GRMZM5G863198	Zm00001d016257	ZmbHLH170	GRMZM2G082630	Zm00001d031818
ZmbHLH18	GRMZM2G082343	Zm00001d013370	ZmbHLH69	GRMZM2G378653	Zm00001d046759	ZmbHLH120	GRMZM2G109605	Zm00001d012642	ZmbHLH171	GRMZM2G024530	Zm00001d045046
ZmbHLH19	GRMZM2G066057	Zm00001d008444	ZmbHLH70	GRMZM2G397755	Zm00001d039459	ZmbHLH121	GRMZM2G083504	Zm00001d006065	ZmbHLH172	GRMZM2G017586	-
ZmbHLH20	GRMZM2G414252	Zm00001d005841	ZmbHLH71	GRMZM2G120021	Zm00001d033412	ZmbHLH122	AC233960.1_FG005	Zm00001d017724	ZmbHLH173	GRMZM5G882527	Zm00001d031665
ZmbHLH21	AC233899.1_FG002	Zm00001d048229	ZmbHLH72	GRMZM2G170559	Zm00001d016354	ZmbHLH123	GRMZM2G369629	Zm00001d037528	ZmbHLH174	GRMZM2G016039	-
ZmbHLH22	GRMZM2G162450	Zm00001d009715	ZmbHLH73	GRMZM2G008898	Zm00001d007768	ZmbHLH124	GRMZM2G132550	Zm00001d037749	ZmbHLH175	GRMZM2G173534	Zm00001d042263
ZmbHLH23	GRMZM2G178182	Zm00001d006110	ZmbHLH74	GRMZM2G035156	Zm00001d027855	ZmbHLH125	GRMZM2G017349	Zm00001d045212	ZmbHLH176	GRMZM2G002627	Zm00001d017559
ZmbHLH24	GRMZM2G085751	Zm00001d053391	ZmbHLH75	GRMZM2G395549	-	ZmbHLH126	GRMZM2G057413	Zm00001d042062	ZmbHLH177	GRMZM2G004732	Zm00001d024220
ZmbHLH25	GRMZM2G081816	Zm00001d044242	ZmbHLH76	GRMZM2G112629	Zm00001d040148	ZmbHLH127	GRMZM2G128807	Zm00001d014814	ZmbHLH178	GRMZM2G009837	Zm00001d013232
ZmbHLH26	GRMZM2G018472	-	ZmbHLH77	GRMZM2G463133	-	ZmbHLH128	GRMZM2G314882	Zm00001d054038	ZmbHLH179	GRMZM2G017145	Zm00001d022223
ZmbHLH27	GRMZM2G092091	Zm00001d033870	ZmbHLH78	GRMZM2G049686	-	ZmbHLH129	GRMZM5G856837	Zm00001d014995	ZmbHLH180	GRMZM2G054564	Zm00001d023882
ZmbHLH28	GRMZM2G155043	Zm00001d033413	ZmbHLH79	GRMZM2G173862	Zm00001d012642	ZmbHLH130	GRMZM2G033356	Zm00001d049294	ZmbHLH181	GRMZM2G069408	Zm00001d041926
ZmbHLH29	GRMZM2G101350	Zm00001d017778	ZmbHLH80	GRMZM2G142932	Zm00001d006578	ZmbHLH131	GRMZM2G171464	Zm00001d048478	ZmbHLH182	GRMZM2G072820	Zm00001d002121
ZmbHLH30	GRMZM2G036092	Zm00001d018056	ZmbHLH81	GRMZM5G828396	Zm00001d031561	ZmbHLH132	GRMZM2G114873	Zm00001d042482	ZmbHLH183	GRMZM2G074501	Zm00001d034091
ZmbHLH31	GRMZM2G435015	Zm00001d021172	ZmbHLH82	GRMZM2G417164	Zm00001d009778	ZmbHLH133	GRMZM2G437481	Zm00001d025727	ZmbHLH184	GRMZM2G094892	Zm00001d038863
ZmbHLH32	GRMZM2G180406	Zm00001d042373	ZmbHLH83	GRMZM2G169947	Zm00001d040152	ZmbHLH134	GRMZM2G086474	Zm00001d026046	ZmbHLH185	GRMZM2G100313	-
ZmbHLH33	GRMZM2G015666	Zm00001d005939	ZmbHLH84	GRMZM2G159456	Zm00001d027859	ZmbHLH135	GRMZM2G134735	Zm00001d031781	ZmbHLH186	GRMZM2G111666	Zm00001d043699
ZmbHLH34	GRMZM2G045109	Zm00001d046096	ZmbHLH85	GRMZM2G354618	-	ZmbHLH136	GRMZM2G144275	Zm00001d021019	ZmbHLH187	GRMZM2G133675	Zm00001d048901
ZmbHLH35	GRMZM2G173372	Zm00001d027546	ZmbHLH86	GRMZM5G818643	-	ZmbHLH137	GRMZM2G019806	Zm00001d033848	ZmbHLH188	GRMZM2G137426	Zm00001d017138
ZmbHLH36	GRMZM2G008691	Zm00001d052192	ZmbHLH87	GRMZM2G027563	Zm00001d020490	ZmbHLH138	GRMZM2G176141	Zm00001d005740	ZmbHLH189	GRMZM2G138454	Zm00001d005891
ZmbHLH37	GRMZM2G107672	Zm00001d004007	ZmbHLH88	GRMZM2G350165	-	ZmbHLH139	GRMZM2G064638	-	ZmbHLH190	GRMZM2G150729	Zm00001d028664
ZmbHLH38	GRMZM2G165188	Zm00001d048786	ZmbHLH89	AC216731.3_FG001	Zm00001d017804	ZmbHLH140	GRMZM2G475289	Zm00001d027419	ZmbHLH191	GRMZM2G154029	Zm00001d047216
ZmbHLH39	GRMZM2G162382	Zm00001d018967	ZmbHLH90	GRMZM2G153454	Zm00001d021748	ZmbHLH141	GRMZM2G080168	Zm00001d049158	ZmbHLH192	GRMZM2G155217	Zm00001d002200
ZmbHLH40	GRMZM2G526668	Zm00001d050394	ZmbHLH91	GRMZM2G049229	Zm00001d047017	ZmbHLH142	GRMZM2G074438	Zm00001d036807	ZmbHLH193	GRMZM2G155762	Zm00001d026120
ZmbHLH41	GRMZM2G171818	Zm00001d007311	ZmbHLH92	GRMZM2G164341	Zm00001d011187	ZmbHLH143	GRMZM2G043854	Zm00001d047878	ZmbHLH194	GRMZM2G163975	Zm00001d040186
ZmbHLH42	GRMZM2G107276	Zm00001d032213	ZmbHLH93	GRMZM5G899865	Zm00001d033729	ZmbHLH144	GRMZM2G042893	Zm00001d004095	ZmbHLH195	GRMZM2G313058	Zm00001d038612
ZmbHLH43	GRMZM2G165042	Zm00001d033267	ZmbHLH94	GRMZM5G849600	-	ZmbHLH145	GRMZM2G472671	Zm00001d031717	ZmbHLH196	GRMZM2G317317	-
ZmbHLH44	GRMZM2G175480	Zm00001d009999	ZmbHLH95	GRMZM2G107560	Zm00001d006150	ZmbHLH146	GRMZM2G085467	Zm00001d020932	ZmbHLH197	GRMZM2G350312	Zm00001d029339
ZmbHLH45	GRMZM2G481280	Zm00001d035155	ZmbHLH96	GRMZM2G172297	Zm00001d007382	ZmbHLH147	GRMZM2G383841	Zm00001d006733	ZmbHLH198	GRMZM2G389567	Zm00001d032132
ZmbHLH46	GRMZM2G148723	-	ZmbHLH97	AC149829.2_FG004	Zm00001d048309	ZmbHLH148	GRMZM2G080054	Zm00001d002288	ZmbHLH199	GRMZM2G412430	Zm00001d029402
ZmbHLH47	GRMZM2G065374	Zm00001d034298	ZmbHLH98	GRMZM2G340177	Zm00001d046346	ZmbHLH149	GRMZM2G001930	Zm00001d030028	ZmbHLH200	GRMZM2G440529	Zm00001d043248
ZmbHLH48	GRMZM2G027068	Zm00001d034596	ZmbHLH99	GRMZM2G076636	Zm00001d009013	ZmbHLH150	GRMZM2G045431	Zm00001d020705	ZmbHLH201	GRMZM2G454022	Zm00001d008404
ZmbHLH49	GRMZM2G137374	Zm00001d027496	ZmbHLH100	GRMZM2G313756	Zm00001d025205	ZmbHLH151	GRMZM2G137541	Zm00001d005964	ZmbHLH202	GRMZM5G896413	Zm00001d028314
ZmbHLH50	GRMZM2G137380	Zm00001d027497	ZmbHLH101	GRMZM2G173521	Zm00001d004007	ZmbHLH152	GRMZM5G839518	Zm00001d016873
ZmbHLH51	GRMZM2G139372	Zm00001d053895	ZmbHLH102	GRMZM2G355469	Zm00001d025462	ZmbHLH153	GRMZM2G036554	Zm00001d024781
	v3 and v4 indicate the maize B73 genome annotation version NO.
